# Supplementary material for: Early Genomic, Epidemiological, and Clinical Description of the SARS-CoV-2 Omicron Variant in Mexico City
Source: MDPI journal article supplement (doi:10.3390/v14030545), 2022-03-06
Supplement: s1 [file s1]

# Early Genomic, Epidemiological, and Clinical Description of the SARS-CoV-2 Omicron Variant in Mexico City

## SUPPLEMENTARY FIGURES

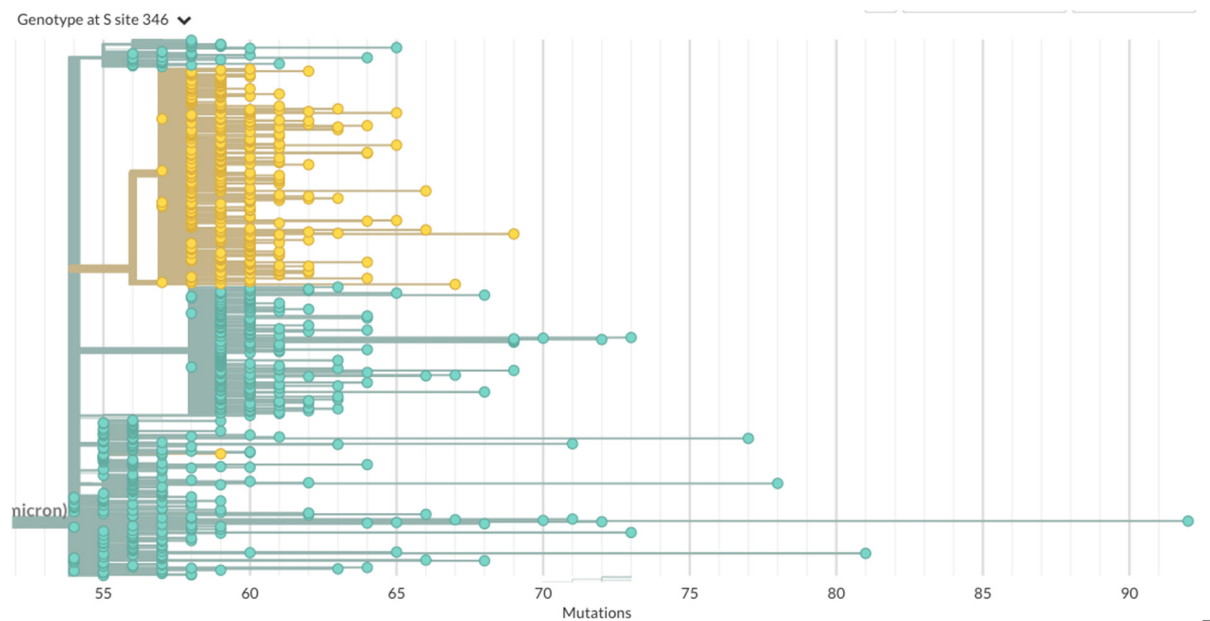

**Supplementary Figure S1.** Phylogeny of omicron samples in Mexico City, samples with R346K substitution clustering in a monophyletic group.



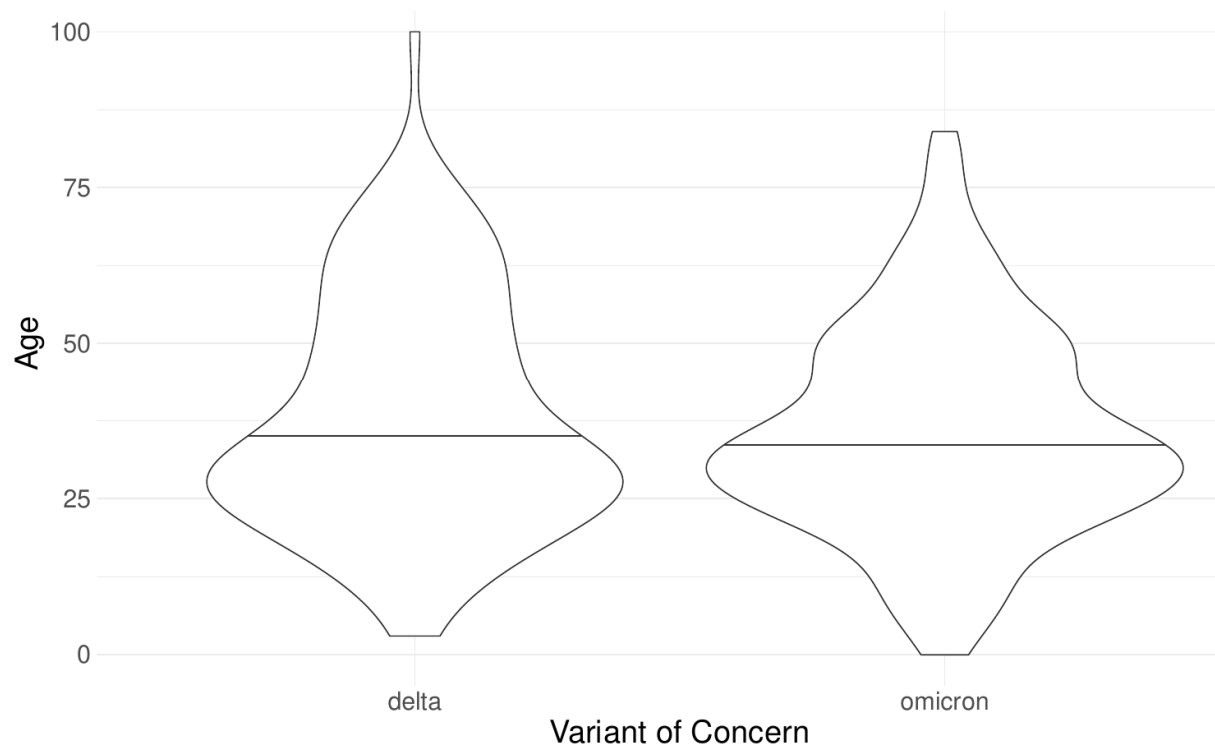

**Supplementary Figure S3.** Violin plot of age distribution by VOC, showing no significant differences between groups.

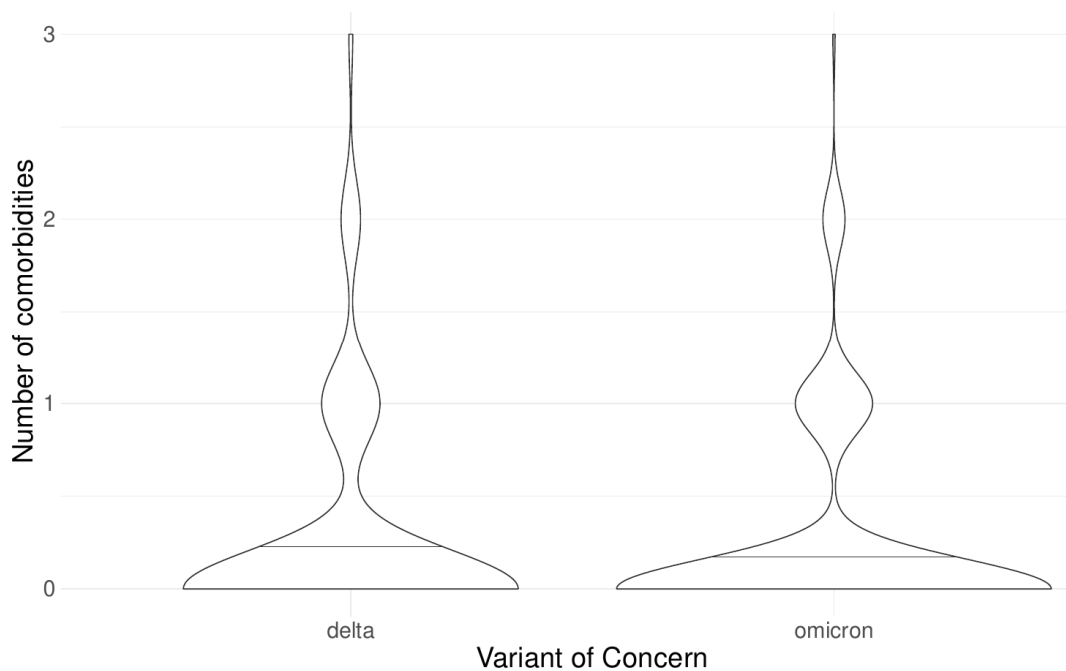

**Supplementary Figure S4.** Violin plot of number of comorbidities distribution by VOC, showing no significant differences between groups.

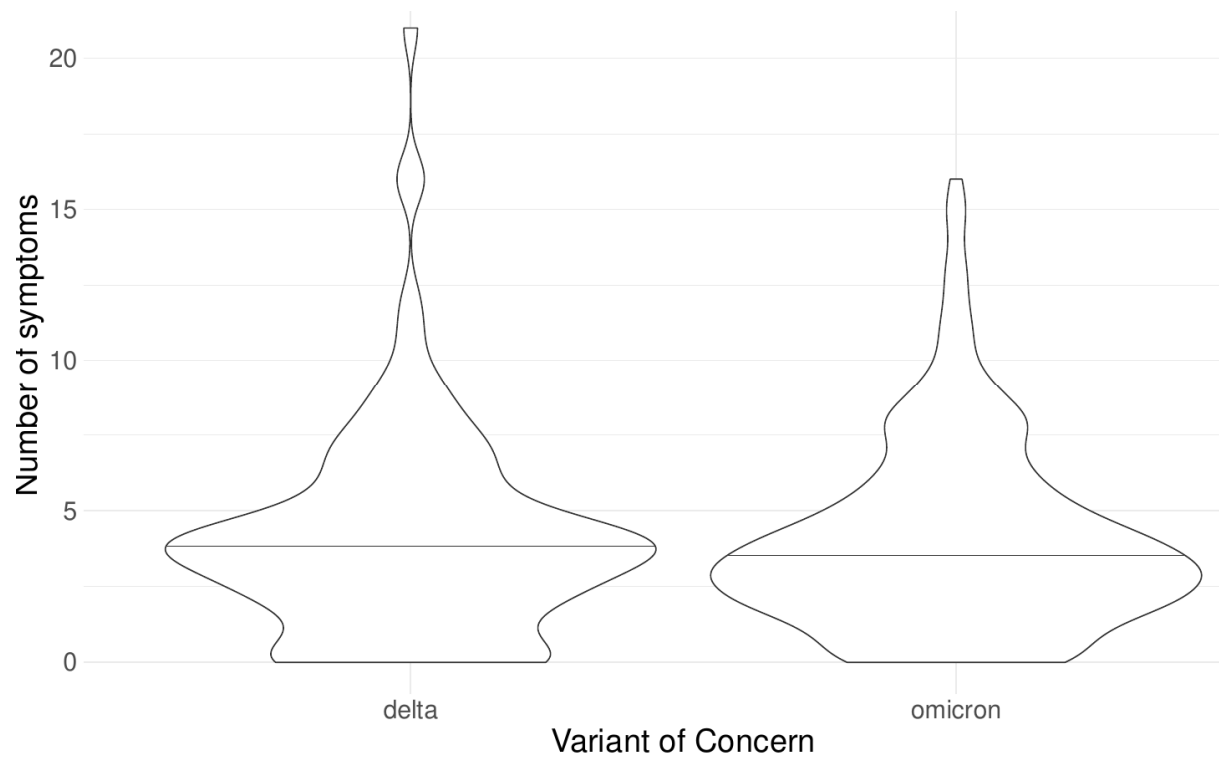

**Supplementary Figure S5.** Violin plot of symptoms number distribution by VOC,, showing no significant differences between groups.
